# Supplementary material for: Autofocals: Evaluating gaze-contingent eyeglasses for presbyopes
Source: PubMed Central journal article supplement — Sci Adv. 2019 Jun 28;5(6):eaav6187. doi: 10.1126/sciadv.aav6187 (PMC6598771; doi:10.1126/sciadv.aav6187), 2019-06-28
Supplement: aav6187_Preference_Questionnaire.pdf [file aav6187_Preference_Questionnaire.pdf]

**Autofocals Post-Questionnaire**

**ID** \_\_\_\_\_

**Age** \_\_\_\_\_

**Gender** \_\_\_\_\_

**Current Presbyopia Correction:** Progressives    Monovision

*Correction reference*

Eye-tracked depth – where focus changes with both eye and head movement

Head-tracked depth – where focus only changes head movement, movement, *not* eye movement

My own correction – your glasses and/or contacts

Rank (**no ties**) the corrections in order of which were the most physically comfortable (consider, would you wear them all day?).  
(1 = most comfortable)

|                                |   |   |
|--------------------------------|---|---|
| Eye-tracked/head-tracked depth | 1 | 2 |
| My own correction              | 1 | 2 |

Comments?

---



---



---

Rank (**no ties**) the corrections in order of which made it easiest to switch between focusing clearly at multiple distances.  
(1 = easiest)

|                    |   |   |   |
|--------------------|---|---|---|
| Eye-tracked depth  | 1 | 2 | 3 |
| Head-tracked depth | 1 | 2 | 3 |
| My own correction  | 1 | 2 | 3 |

Comments?

---



---



---

(continued on back)
